# Supplementary material
Source: PubMed Central journal article supplement (PMC4984442)
Supplement: 12088_2016_567_MOESM1_ESM.pdf [file 12088_2016_567_MOESM1_ESM.pdf]

## **Online Resource 1**

**Title:** Detection and Localization of *Wolbachia* in *Thrips palmi* Karny (Thysanoptera: Thripidae).

**Journal name:** Indian Journal of Microbiology

**Authors:** Gunjan Kumar Saurav, Guisuibou Daimei, Vipin Singh Rana, Sonam Popli and Raman Rajagopal\*

Gut Biology Laboratory, Room No. 117, Department of Zoology, University of Delhi, Delhi, India-110007.

### **\*Corresponding Author and Address**

Raman Rajagopal, Gut Biology Laboratory, Room No. 117, Department of Zoology, University of Delhi, Delhi, India-110007.

Email: [zoorajagopal@gmail.com](mailto:zoorajagopal@gmail.com)

Phone: 91-11-27662275/ 27667985

Fax: 011 27667985

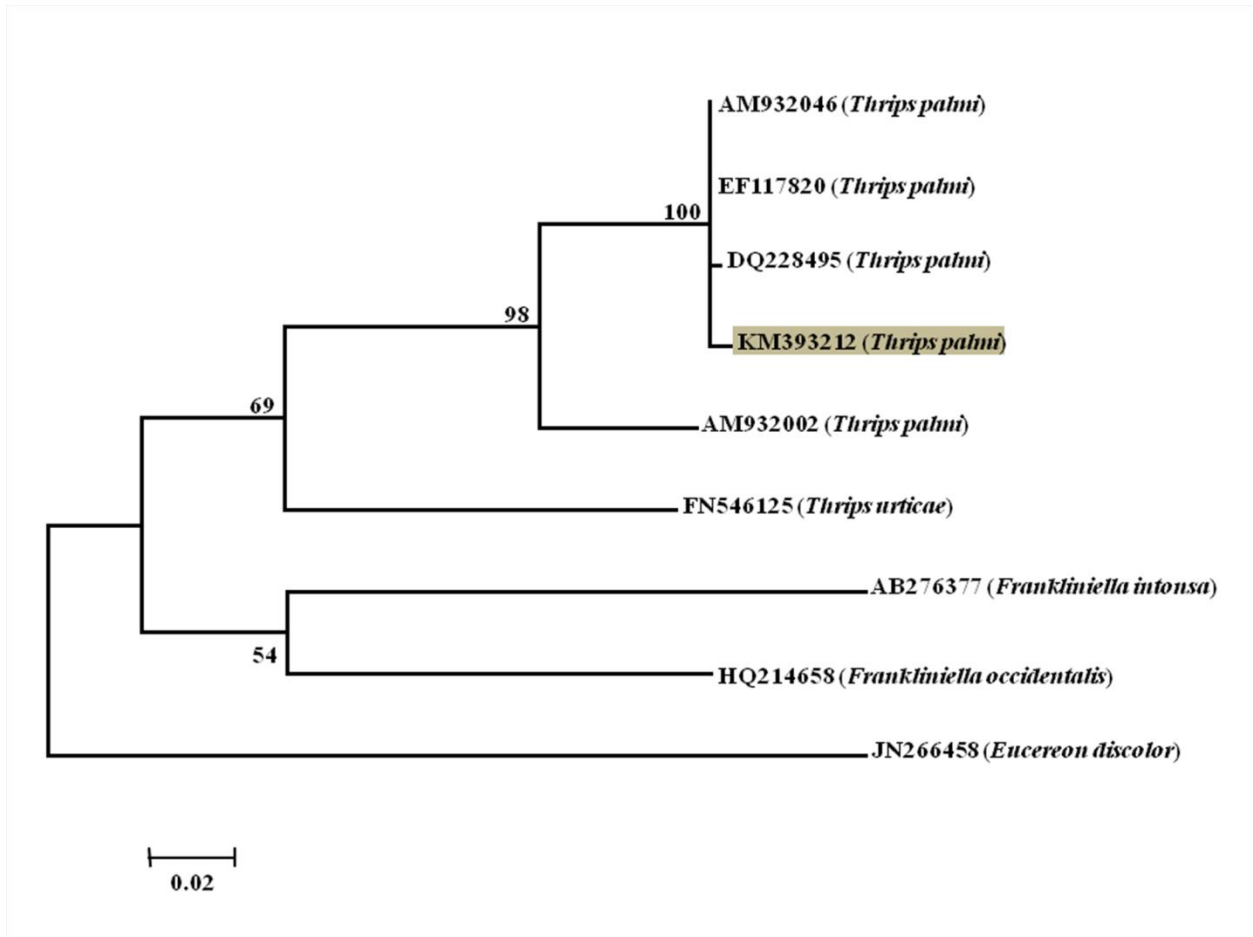

**Fig. S1** Phylogenetic tree based on partial *mtCOI* gene sequence showing relationship of *Thrips palmi* from our study with previously submitted *mtCOI* gene sequences of *Thrips palmi* and other thrips species from NCBI database. For outgroup *mtCOI* gene sequence of *Eucereon discolor* (Order: Lepidoptera) was taken. Maximum likelihood analysis with Jukes-Cantor correction was performed for tree construction using MEGA6. Only bootstrap values above 50% are indicated. Sequence obtained from this study is shown with dark background.

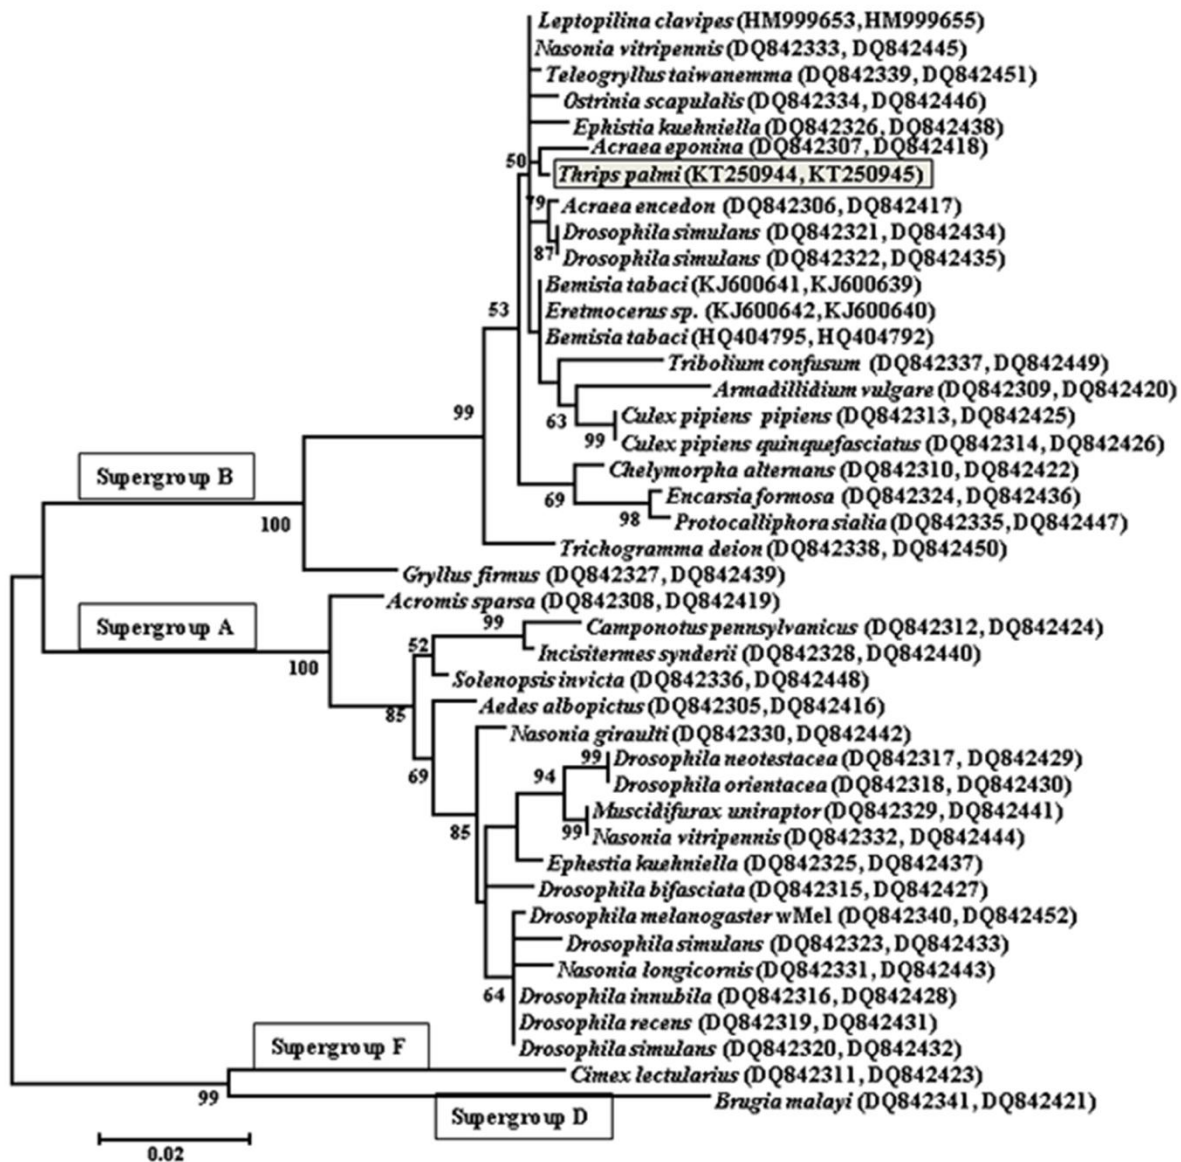

**Fig. S2** Phylogenetic tree based on concatenated sequence of *ftsZ* and *gatB* genes of *Wolbachia* from *T. palmi* with previously submitted sequences of same genes of *Wolbachia* from NCBI database. Maximum likelihood analysis with Jukes-Cantor correction was performed for tree construction using MEGA6. Only bootstrap values higher than 50% are indicated. Sequence obtained from this study is shown with dark background.

**Table S1:** Main morphological characters that were used for the identification of *T. palmi*

| Serial no. | Main morphological characters that were used for the identification of <i>T. palmi</i>                |
|------------|-------------------------------------------------------------------------------------------------------|
| 1.         | Position of interocellar setae – arise from outside the ocellar triangle                              |
| 2.         | Colours of ocelli crescents – red pigment                                                             |
| 3.         | Metanotal sculpture - irregular longitudinal lines converging mesad posteriorly and never reticulate. |
| 4.         | Tergite II – four lateral setae                                                                       |
| 5.         | Forewing - upper vein with 3 distal setae                                                             |
| 6.         | Targite VIII – microtrichial comb slender and complete                                                |
